# Supplementary material for: NaCl template-assisted construction of a CoP–MoP heterostructured electrocatalyst for electrocatalytic nitrogen reduction
Source: Royal Society of Chemistry journal article supplement (doi:10.1039/d3dt00686g), 2023-01-01
Supplement: d3dt00686g1.pdf [file d3dt00686g1.pdf]

## Electronic Supplementary Information

### NaCl Template-assisted Construction of CoP-MoP Heterostructured Electrocatalyst for Electrocatalytic Nitrogen Reduction

Yunni Liu<sup>#a</sup>, Yinghao Tao<sup>#b</sup>, Zhaobing Lu<sup>c</sup>, Jing Teng<sup>c</sup>, Weiju Hao<sup>b</sup>, Jun Lin<sup>a\*</sup>, Guisheng Li<sup>b\*</sup>

<sup>a</sup> Department of Chemistry, Renmin University of China, Beijing 100872, P. R. China.

<sup>b</sup> School of Materials and Chemistry, University of Shanghai for Science and Technology, Shanghai 200093, P. R. China.

<sup>c</sup> Shanghai Key Laboratory of Materials Protection and Advanced Materials in Electric Power, College of Environmental and Chemical Engineering, Shanghai University of Electric Power, Shanghai 200090, P. R. China

Corresponding author: Email: [jlin@ruc.edu.cn](mailto:jlin@ruc.edu.cn); [liguisheng@usst.edu.cn](mailto:liguisheng@usst.edu.cn);

#### S1. Electrodes preparation

The working electrodes were prepared by applying catalyst ink on carbon cloth ( $1 \times 1 \text{ cm}^2$ ). Specifically, 5 mg of CoP-MoP-x sample were dispersed in a solvent mixture of 980  $\mu\text{L}$  of ethanol and 20  $\mu\text{L}$  of Nafion solution and sonicated for 30 min to form a homogeneous sample ink. A total of 100  $\mu\text{L}$  of well-dispersed sample ink were applied on a clean carbon cloth surface. The prepared electrodes were dried at 60 °C overnight to completely remove the dispersant. The loading was  $\sim 500 \mu\text{g} \cdot \text{cm}^{-2}$ .

#### S2. Indophenol blue method for for determining the yield of $\text{NH}_3$ <sup>[1]</sup>

4 mL of the absorption solution were removed from the electrochemical vessel. Then, 0.5 mL of 1.0 M NaOH solution containing 5 wt% salicylic acid and 5 wt% sodium citrate was added to the absorption solution as a colorant, while 0.5 mL of 0.05 M NaClO as an oxidizing agent and 0.2 mL of 1 wt% sodium nitroferricyanide as a catalyst were added dropwise to the mixed solution. After stabilization for 2 h at room temperature and protected from light, an ultraviolet-visible spectrophotometer (UV-2600, Shimadzu) was used to measure the absorption spectra of the mixed solutions in the range of 500-800 nm. The standard fit curve showed a good linear relationship

between absorbance and NH<sub>3</sub> concentration ( $y = 0.10116x + 0.00449$ ,  $R^2 = 0.997$ ). The NH<sub>3</sub> yield ( $R_{\text{NH}_3}$ ) was calculated by using the following equation (1):

$$R_{\text{NH}_3} = (C_{\text{NH}_3} \times V)/(t \times m) \quad (1)$$

where  $C_{\text{NH}_3}$  is the NH<sub>3</sub> concentration, V is the volume of the cathode electrolyte, t is the electrochemical reaction time, and m is the effective mass of catalyst involved in the reaction.

### S3. Determination of FE

Assuming three electrons were needed to produce one NH<sub>3</sub> molecule, the Faraday efficiency (FE) in 0.1 M Na<sub>2</sub>SO<sub>4</sub> could be calculated as the following equation (2):

$$\text{FE} = 3F \times C_{\text{NH}_3} \times V/(17 \times Q) \quad (2)$$

where F is the Faraday constant (96485 C mol<sup>-1</sup>),  $C_{\text{NH}_3}$  is the NH<sub>3</sub> concentration, and Q is the total charge in the electrocatalytic process.

### S4. Watt and Chrisp method for determining the concentration of N<sub>2</sub>H<sub>4</sub><sup>[2]</sup>

Specifically, the color developer was obtained by mixing 5.99 g of p-dimethylaminobenzaldehyde, 30 mL of 0.1 M HCl, and 300 mL of ethanol. Then, 5 mL of absorbent were removed from the electrochemical vessel, added to 5 mL of color developer, and stirred at room temperature for 20 min. The absorption spectra were measured by UV-Vis spectrophotometer. The standard fit curve showed a good linear relationship between absorbance and N<sub>2</sub>H<sub>4</sub> concentration ( $y = 0.16781x + 0.00146$ ,  $R^2 = 0.999$ ).

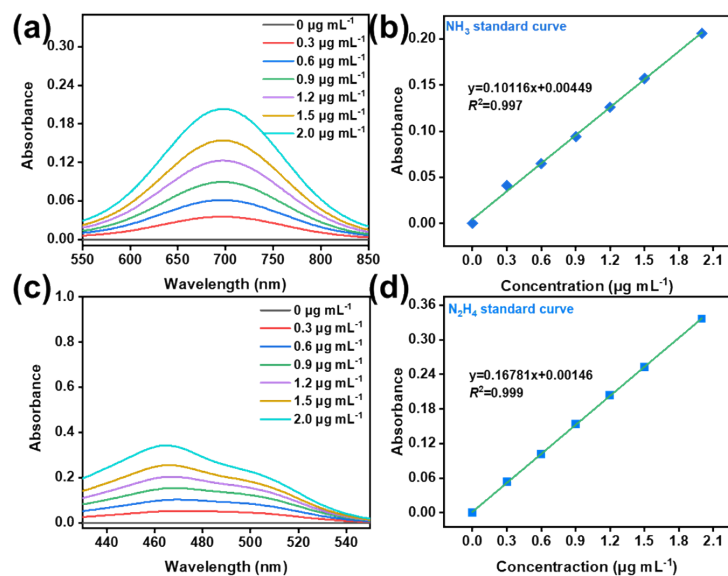

**Fig. S1.** (a) The UV-Vis absorption spectrum of  $\text{NH}_3$  obtained using indophenol blue method and the (b) corresponding calibration curve. (c) The UV-Vis absorption spectrum of  $\text{N}_2\text{H}_4$  obtained using Watt-Chrisp method and the (d) corresponding calibration curve.

## References

- [1]. Zhu, D.; Zhang, L.; Ruther, R. E.; Hamers, R. J., Photo-illuminated diamond as a solid-state source of solvated electrons in water for nitrogen reduction. *Nat. Mater.*, **2013**, *12* (9), 836-41.
- [2]. Zhou, S.; Yang, X.; Xu, X.; Dou, S. X.; Du, Y.; Zhao, J., Boron Nitride Nanotubes for Ammonia Synthesis: Activation by Filling Transition Metals. *J. Am. Chem. Soc.*, **2020**, *142* (1), 308-317.
